# Supplementary material for: Pathogenesis, Clinical Features, and Treatment of Patients with Myelin Oligodendrocyte Glycoprotein (MOG) Autoantibody-Associated Disorders Focusing on Optic Neuritis with Consideration of Autoantibody-Binding Sites: A Review
Source: MDPI journal article supplement (doi:10.3390/ijms241713368), 2023-08-29
Supplement: s1 [file s1]

Supplementary Table S1. Comparison of Anti-MOG and Anti-AQP4 Antibody Ratios in Optic Neuritis Patients Across Different Regions. [Ref.15, 17-19]

| Optic Neuritis Patients  | MOG-Ab (+) | AQP4-Ab (+) |
|--------------------------|------------|-------------|
| US (Mayo Clinic) (n=246) | 32 (13)    | 47 (19)     |
| Korea (n=270)            | 17 (6.3)   | 49 (18.1)   |
| Germany (n=522)          | 87 (16.7)  | 83 (15.9)   |
| Japan (n=531)            | 53 (10)    | 64 (12)     |

A cross-sectional cohort study conducted in different populations across the world showed that the prevalence rates were similar across all populations studied..

Supplementary Figure S1. Age distribution in MOG-positive/AQP4-positive/double negative group.

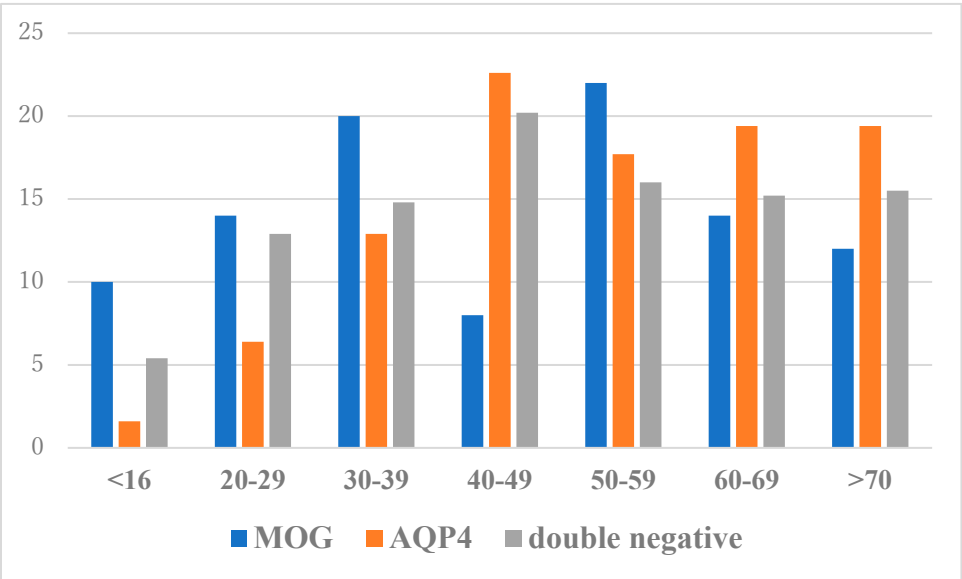

The anti-AQP4 autoantibody positivity increased with age whereas the anti-MOG autoantibody positivity exhibited biphasic peaks in the fourth and sixth decades of life.
